# Supplementary material
Source: MDPI journal article supplement (https://www.mdpi.com/2071-1050/13/5/2792)
Supplement: s1 [file s1]

### Supplementary Material

**Table S1.** The twelve (12) bioclimatic, topographic and land-use variables used as input variables in the MaxEnt modelling.

| Abbreviation | Variable                                                                      | Units                                |
|--------------|-------------------------------------------------------------------------------|--------------------------------------|
| Bio1         | Annual Mean Temperature                                                       | °C                                   |
| Bio3         | Isothermality. Mean diurnal temperature range / annual temperature range *100 | -                                    |
| Bio4         | Temperature Seasonality                                                       | Coefficient of variation;<br>°C      |
| Bio5         | Max. The temperature of Warmest Month                                         | °C                                   |
| Bio6         | Min. Temperature of Coldest Month                                             | °C                                   |
| Bio12        | Annual Precipitation                                                          | Mm                                   |
| Bio15        | Precipitation Seasonality (Coefficient of Variation)                          | Coefficient of variation;<br>percent |
| Bio16        | Precipitation of Wettest Quarter                                              | Mm                                   |
| Bio17        | Precipitation of Driest Quarter                                               | Mm                                   |
| DEM          | Elevation                                                                     | M                                    |
| Slope        | Slope                                                                         | Percent                              |
| LULUC        | Land-Use Change                                                               | -                                    |
